# Supplementary material for: MALDI-TOF MS as one of the alternative tools for detecting outbreaks of strains carrying the carbapenemase gene
Source: Research Square preprint supplement (doi:10.21203/rs.3.rs-3244386/v1), 2023-09-05
Supplement: Supplementary file 1 [file 02d52003575bc36d1046f233.docx]

**Table S2** Adjusted Rand index and Wallace coefficient for the methods used to cluster 51 CRKP isolates from ICU unit (using the correlation distance measured by the average linkage algorithm and selecting ‘Score Oriented Dendrogram’ option)

|  | Adjusted Rand index | | Wallace coefficient | |
| --- | --- | --- | --- | --- |
| Typing Methods | PFGE | MALDI-TOF MS | PFGE | MALDI-TOF MS |
| PFGE | 1.000 | - | - | 0.072 |
| MALDI-TOF MS | 0.078 | 1.000 | 0.084 | - |
