# Supplementary material for: MALDI-TOF MS as one of the alternative tools for detecting outbreaks of strains carrying the carbapenemase gene
Source: Research Square preprint supplement (doi:10.21203/rs.3.rs-3244386/v1), 2023-09-05
Supplement: Supplementary file 2 [file d3c4af11abe1b0e75c571f31.docx]

**Table S1-1** Adjusted Rand index and Wallace coefficient for the methods used to cluster 70 CRKP isolates (using the correlation distance measured by the average linkage algorithm and selecting ‘Score Oriented Dendrogram’ option)

|  | Adjusted Rand indexa | | Wallace coefficientb | |
| --- | --- | --- | --- | --- |
| Typing Methods | MLST | MALDI-TOF MS | MLST | MALDI-TOF MS |
| MLST | 1.000 | - | - | 0.321 |
| MALDI-TOF MS | 0.403 | 1.000 | 0.542 | - |

aThe adjusted Rand index (ARI) can be used to quantify the consistency of the results of the two clustering methods. The ARI takes values in the range [-1,1], and larger values indicate better agreements between the results of the two typing methods.

bThe Wallace coefficient indicates whether the partition defined by a given method can be predicted from the results of another method.

**Table S1-2** Adjusted Rand index and Wallace coefficient for the methods used to cluster 70 CRKP isolates (using the correlation distance measured by the ward linkage algorithm and selecting ‘Score Oriented Dendrogram’ option)

|  | Adjusted Rand index | | Wallace coefficient | |
| --- | --- | --- | --- | --- |
| Typing Methods | MLST | MALDI-TOF MS | MLST | MALDI-TOF MS |
| MLST | 1.000 | - | - | 0.708 |
| MALDI-TOF MS | 0.572 | 1.000 | 0.479 | - |
