# Supplementary material for: MALDI-TOF MS as one of the alternative tools for detecting outbreaks of strains carrying the carbapenemase gene
Source: Research Square preprint supplement (doi:10.21203/rs.3.rs-3244386/v1), 2023-09-05
Supplement: Supplementary file 3 [file ead58c5fa23a0d4c1270f481.docx]

**Table S4** Adjusted Rand index and Wallace coefficient for the methods used to cluster 10 ECC isolates (using the correlation distance measured by the average linkage algorithm and selecting ‘Score Oriented Dendrogram’ option)

|  | Adjusted Rand index | | Wallace coefficient | |
| --- | --- | --- | --- | --- |
| Typing Methods | PFGE | MALDI-TOF MS | PFGE | MALDI-TOF MS |
| PFGE | 1.000 | - | - | 1.000 |
| MALDI-TOF MS | 0.727 | 1.000 | 0.571 | - |
