# Supplementary material for: MALDI-TOF MS as one of the alternative tools for detecting outbreaks of strains carrying the carbapenemase gene
Source: Research Square preprint supplement (doi:10.21203/rs.3.rs-3244386/v1), 2023-09-05
Supplement: Supplementary file 4 [file f58ca0b8e904e70ba218b3a8.docx]

**Table S3-1** Adjusted Rand index and Wallace coefficient for the methods used to cluster 24 ECC isolates (using the correlation distance measured by the average linkage algorithm and selecting ‘Score Oriented Dendrogram’ option)

|  | Adjusted Rand index | | | Wallace coefficient | | |
| --- | --- | --- | --- | --- | --- | --- |
| Typing Methods | cg-MLST | MLST | MALDI-TOF MS | cg-MLST | MLST | MALDI-TOF MS |
| cg-MLST | 1.000 | - | - | - | 1.000 | 1.000 |
| MLST | 0.755 | 1.000 | - | 0.606 | - | 1.000 |
| MALDI-TOF MS | 0.075 | 0.120 | 1.000 | 0.039 | 0.064 | - |

**Table S3-2** Adjusted Rand index and Wallace coefficient for the methods used to cluster 24 ECC isolates (using the euclidean distance measured by the single linkage algorithm and clearing ‘Score Oriented Dendrogram’ option)

|  | Adjusted Rand index | | | Wallace coefficient | | |
| --- | --- | --- | --- | --- | --- | --- |
| Typing Methods | cg-MLST | MLST | MALDI-TOF MS | cg-MLST | MLST | MALDI-TOF MS |
| cg-MLST | 1.000 | - | - | - | 1.000 | 0.464 |
| MLST | 0.755 | 1.000 | - | 0.606 | - | 0.434 |
| MALDI-TOF MS | 0.335 | 0.419 | 1.000 | 0.262 | 0.404 | - |
